# Supplementary material for: Adenosine kinase role in melanoma progression and resistance
Source: Research Square preprint supplement (doi:10.21203/rs.3.rs-6635662/v1), 2025-05-14
Supplement: Supplementary file 1 [file ff51338ceb09d44317adf2b5.docx]

**SUPPLEMENTARY MATERIAL**


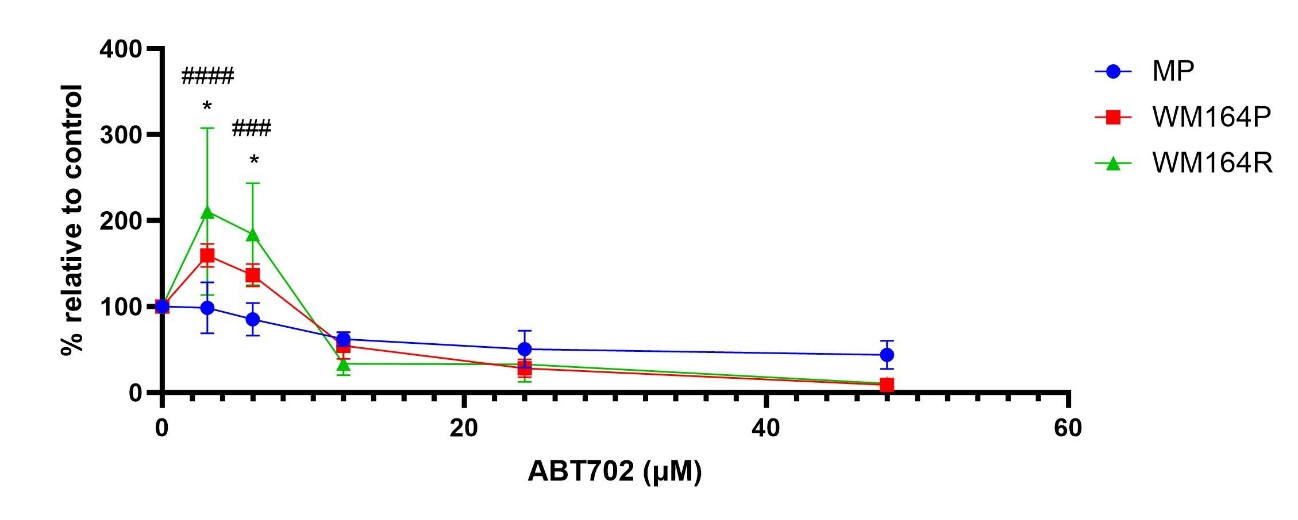


**Supplementary Figure 1 –** Cytotoxicity analysis using the trypan blue exclusion assay in primary melanocytes and WM164 parental and resistant cell lines treated with ABT702 for 48 hours. The graph displays cell viability expressed as a percentage relative to untreated control. MP: primary melanocyte; P: parental; R: resistant. Data are presented as a mean percentage relative to the untreated control. p<0.05 for WM164P vs. MP; ####p<0.0001 for WM164R vs. MP.
